# Supplementary material
Source: PubMed Central journal article supplement (PMC4071620)
Supplement: NIHMS602660-supplement-Supplementary_Data.pdf [file NIHMS602660-supplement-Supplementary_Data.pdf]

**Supplemental Material**



**Fig. S1.** Detailed HLA binding motif analysis. **(a)** proportion of HLA-A2 and -B7 phosphopeptides of given residue length. **(b)** Phosphate position in B7 and A2 phosphopeptides. Residue frequency (%) depicted in combined logoplots and heatmaps for: 41 9-mer HLA-B7 phosphopeptides in this study **(c)**; 164 9-mer phosphopeptides predicted to bind to HLA-B7 where pSer was at P4 **(d)**; 1038 regular non-phosphorylated 9-mer HLA-B7 peptides from the Immune Epitope database **(e)**; five 8-mer **(f)**, twenty-one 10-mer **(g)** and eleven 11-mer **(h)** HLA-B7 phosphopeptides identified in this study. Heatmaps denote percentage frequency of residues at each position.

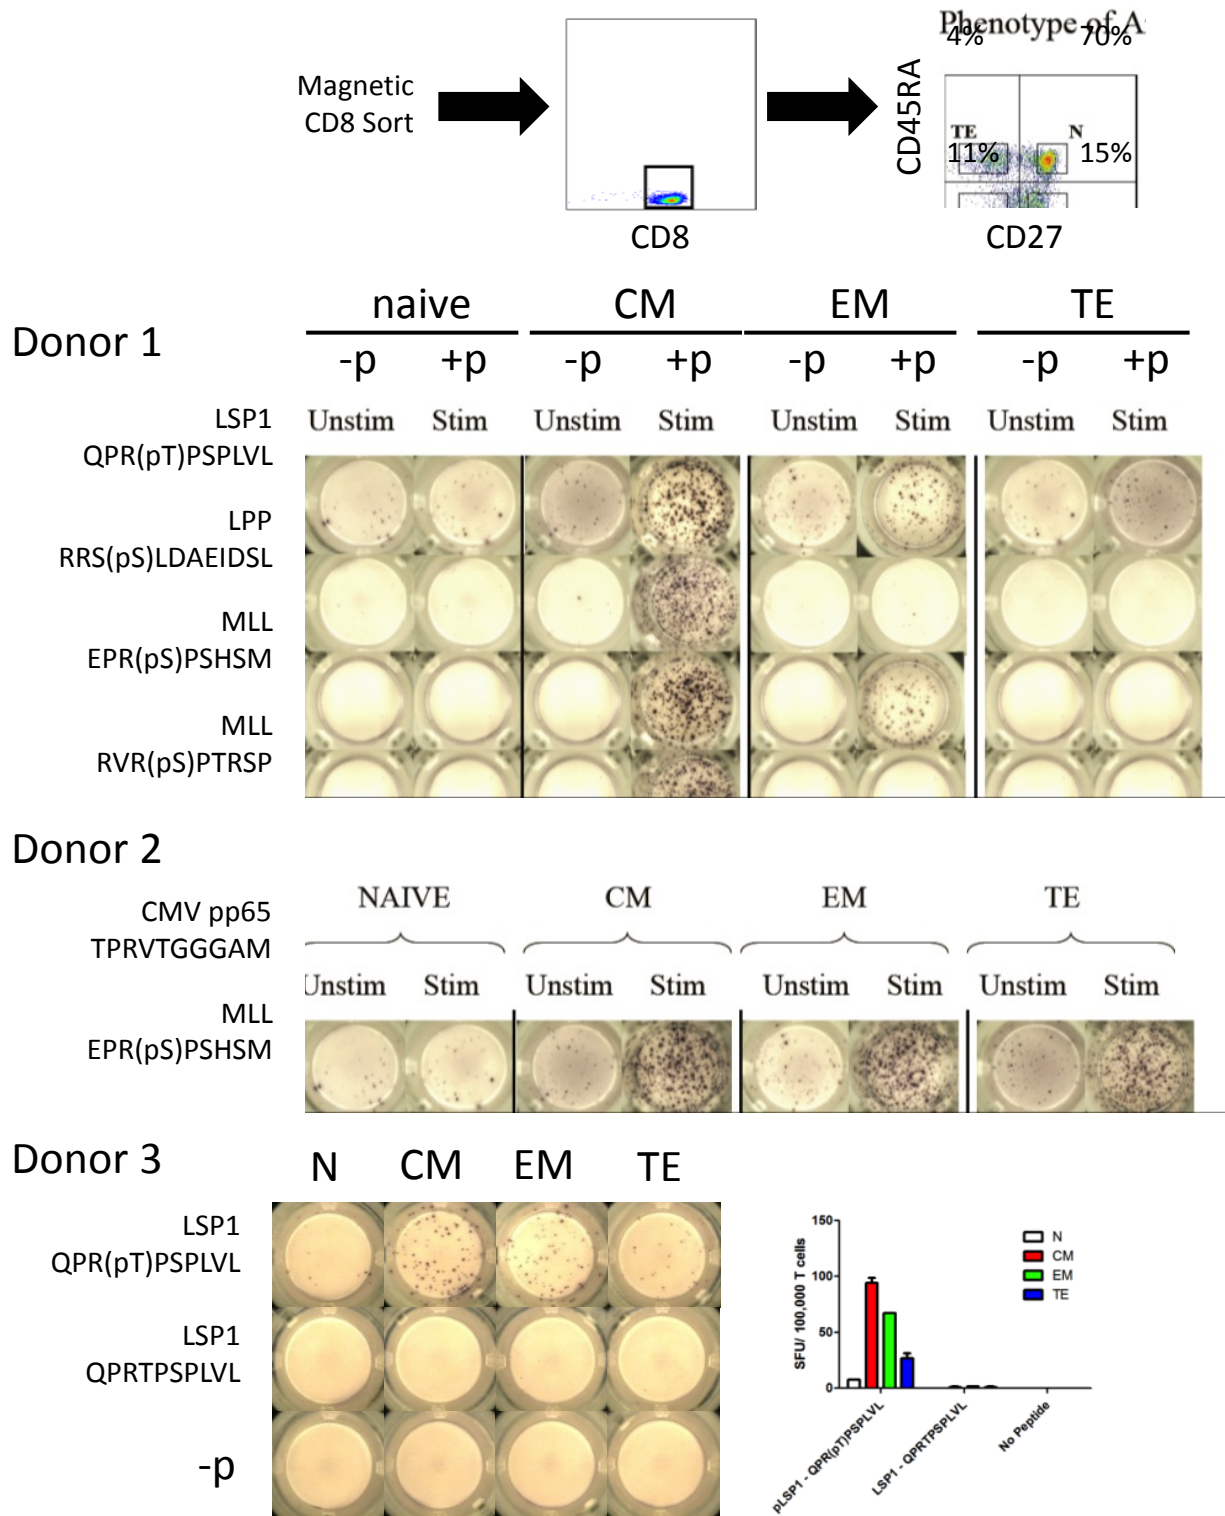

**Fig. S2.** T-cell memory subset mapping of anti-phosphopeptide responses in healthy donors. Representative FACS-sorted T-cell subset profile of freshly isolated, magnetically enriched CD8 T-cells from peripheral blood of healthy donors (upper panel). 100,000 T-cells from each compartment were cultured with phosphopeptides for 7-days. 7-day ELISpot analysis of each T-cell memory subset reveals level of immunity against each respective phosphopeptide in 3 donors. For Donor 3 we tested reactivity against the non-phosphopeptide.

a

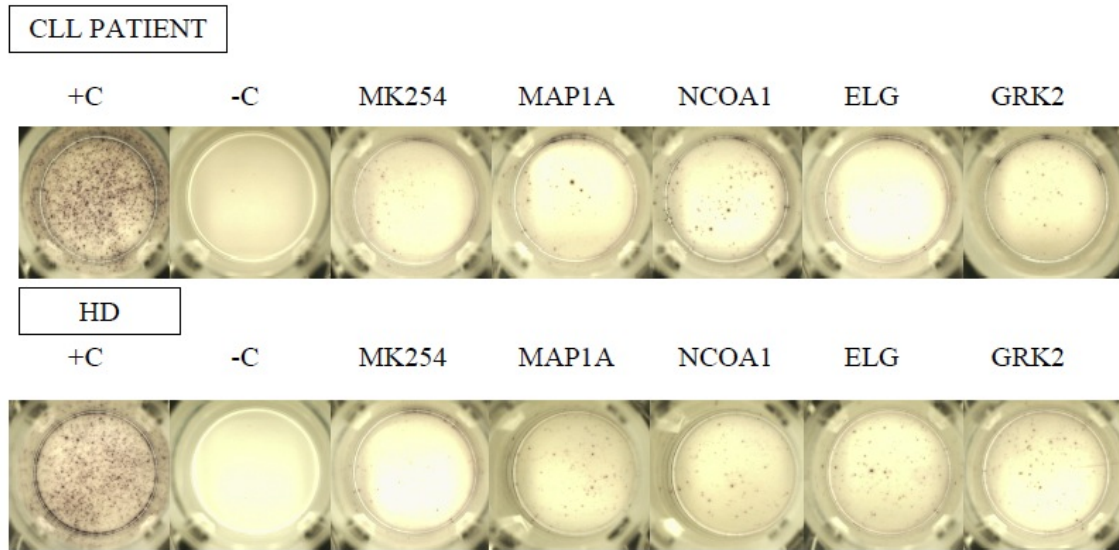

b

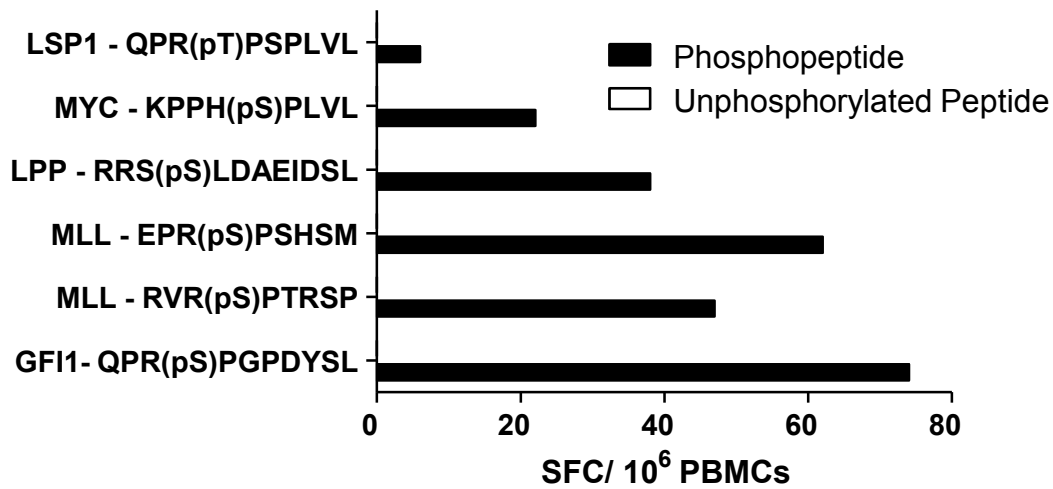

**Fig. S3.** Leukemia-associated phosphopeptide-specific immunity is lacking in CLL patients.

**(a)** Example of ELISpot of enriched CD8<sup>+</sup> T-cells from a patient with CLL and a healthy donor against selected CLL-associated antigens. **(b)** Example of responses observed for phosphopeptide antigens (filled) and counterpart non-phosphorylated peptide in a healthy donor.

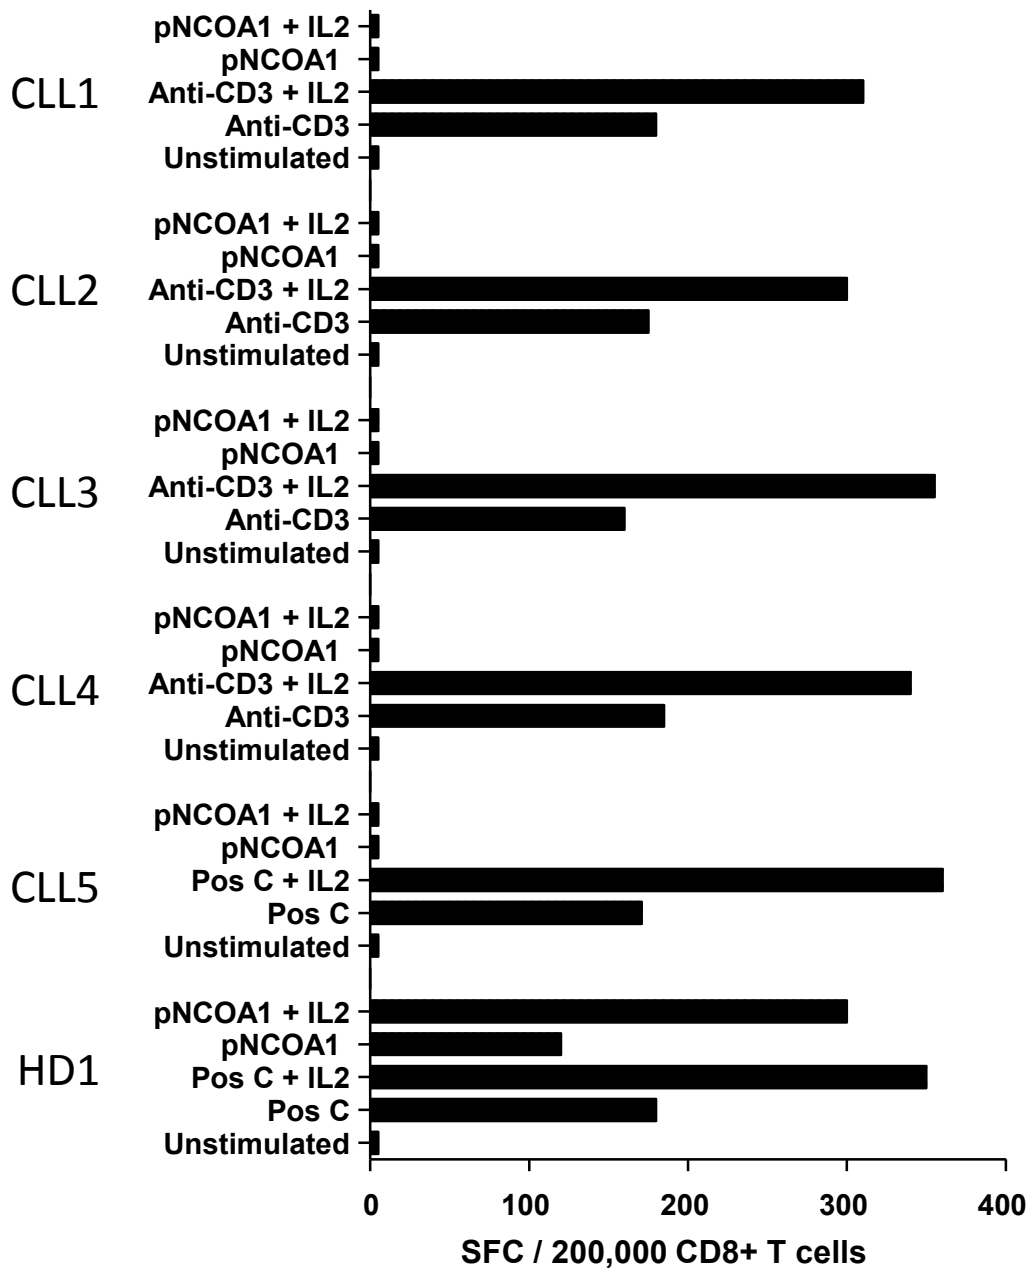

**Fig. S4.** Deletion (rather than anergy) of anti-phosphopeptide immunity in five patients with CLL. Representative 24-hour ELISpot from enriched CD8 T-cells from a healthy donor (HD) and five patients with CLL who lacked anti-phosphopeptide immunity stimulated in presence or absence of IL-2. Responses to anti CD3 (positive control) and the HLA-B7 restricted phosphopeptide (pNCOA1) was assessed.

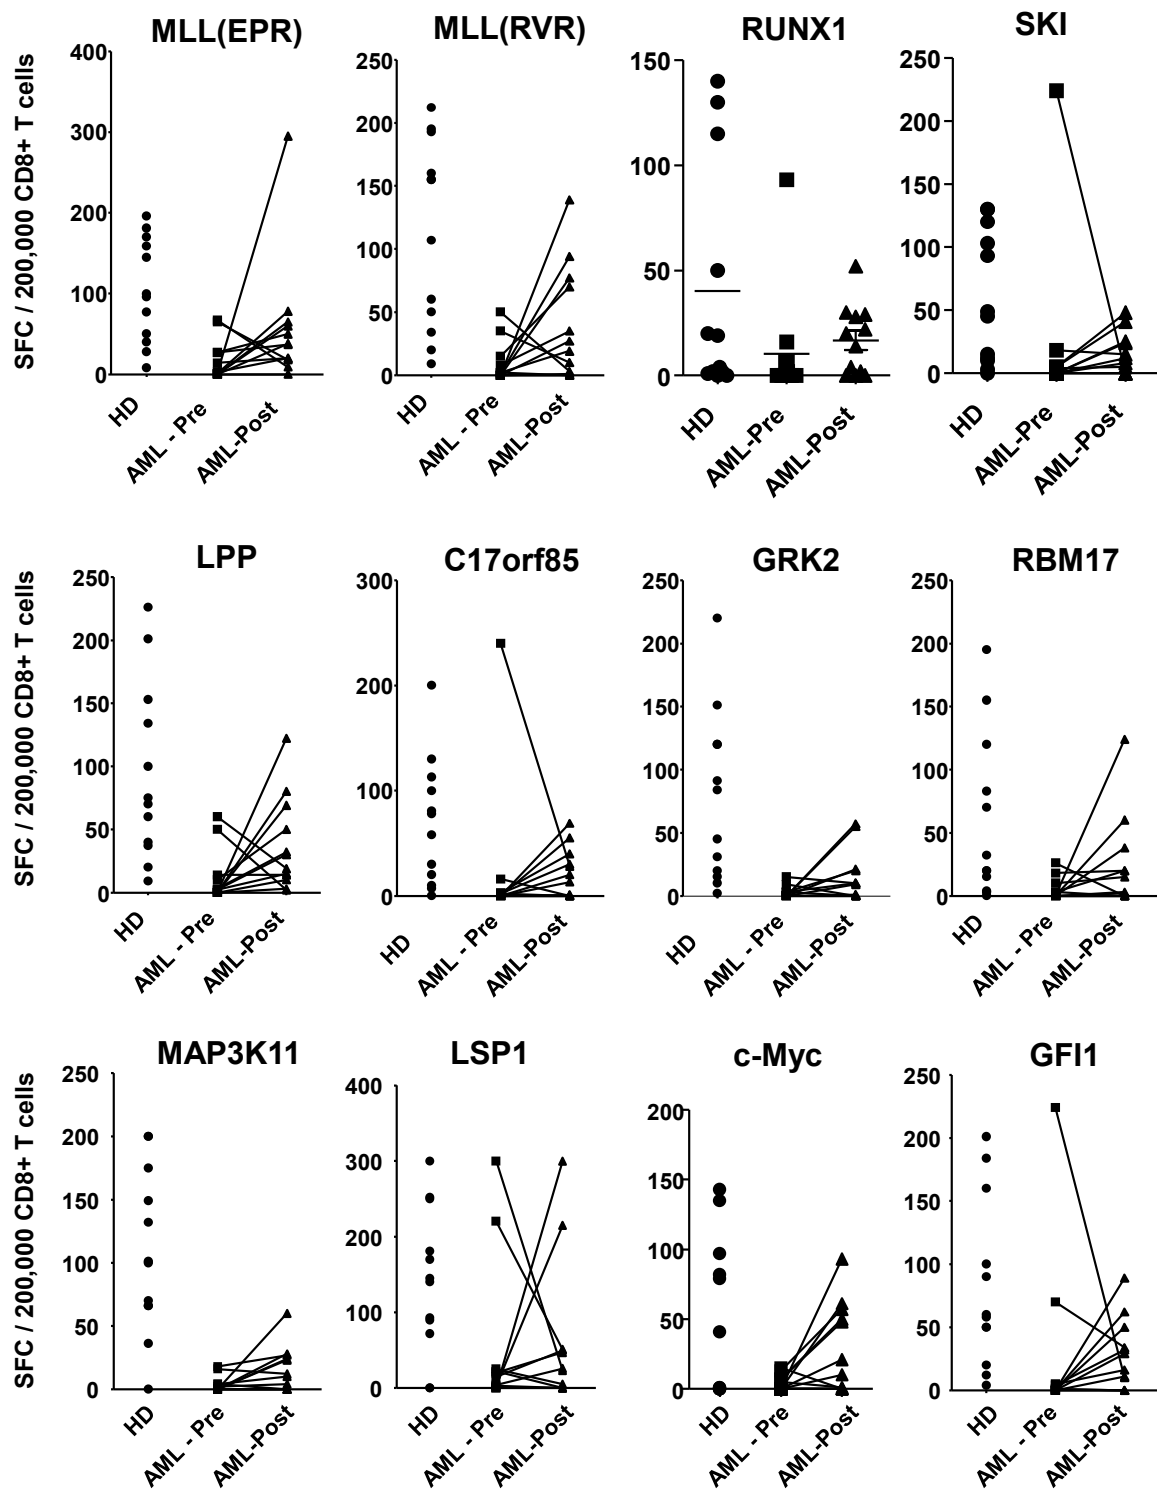

**Fig. S5.** Leukemia-associated phosphopeptide-specific immunity is lacking in AML patients but restored following SCT. ELISpot data for each phosphopeptide between AML patients pre- and post-transplant compared with healthy donors.

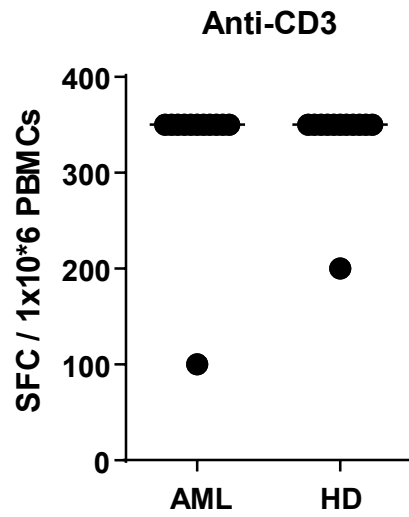

**Fig. S6.** Immunocompetence of patients with AML in complete remission prior to transplantation. Anti-CD3 responses measured by ELISpot among healthy donors (HD) and patients with AML whilst in complete remission pre-transplant



| Patient ID | Time Since Sample | Age | Sex | Stage at presentation (Binet stage) |        | Genetic aberration |        | IgVH | Time to first treatment (days) | Progression free survival after first treatment | Timing of sample(s)                                        | Treatment, status                                   |
|------------|-------------------|-----|-----|-------------------------------------|--------|--------------------|--------|------|--------------------------------|-------------------------------------------------|------------------------------------------------------------|-----------------------------------------------------|
|            |                   |     |     | CD38                                | Zap-70 |                    |        |      |                                |                                                 |                                                            |                                                     |
| CLL1       | 890               | 79  |     | A                                   | POS    | POS                | Normal | UM   | 2387                           | Progressed through chlorambucil                 | Previously treated, slow progressive disease               | Died, Chl, FC, methylpred, died of disease +4695    |
| CLL2       | 420               | 71  |     | A                                   | NEG    | NEG                | NA     | NA   | Untreated                      | Untreated                                       | Untreated                                                  | Alive day +506                                      |
| CLL3       | 1048              | 64  |     | A                                   | NEG    | NA                 | NA     | NA   | 685                            | Progressed 301 days post first tx               | Untreated                                                  | Alive, FCR, transformed to Hodgkins ABVD, day +1142 |
| CLL4       | 945               | 75  |     | A                                   | NEG    | NEG                | Normal | M    | Untreated                      | Untreated                                       | Untreated                                                  | Alive day +5341                                     |
| CLL5       | 688               | 63  |     | A                                   | NEG    | NA                 | NA     | NA   | Untreated                      | Untreated                                       | Untreated                                                  | Alive day +1749                                     |
| CLL6       | 586               | 86  |     | A                                   | NEG    | NEG                | Normal | M    | 3334                           | Died on tx                                      | Prior to first treatment for progressive disease           | Died, Chl, died of disease day +3467                |
| CLL7       | 359               | 70  |     | A                                   | NEG    | NEG                | NA     | NA   | Untreated                      | Untreated                                       | untreated                                                  | Alive, day +1201                                    |
| CLL8       | 359               | 67  |     | A                                   | NEG    | NA                 | 13q    | NA   | 1141                           | Not progressed                                  | Prior to first treatment for progressive disease           | Alive, FCR, day +1460                               |
| CLL9       | 897               | 78  |     | A                                   | NEG    | NEG                | Normal | M    | Untreated                      | Untreated                                       | Untreated                                                  | Alive day +6133                                     |
| CLL10      | 1091              | 89  |     | C                                   | NA     | NA                 | NA     | NA   | 0                              | Partial response                                | All taken on treatment (chlorambucil)                      | Died, Chl, ?died of disease day +362                |
| CLL11      | 540               | 65  |     | B                                   | NEG    | POS                | NA     | NA   | 30                             | Progressed 631 days post first tx               | Previously treated, progressive disease                    | Alive, Chl, FCO, day +1399                          |
| CLL12      | 1064              | 84  |     | C                                   | NEG    | NEG                | NA     | NA   | 68                             | Not progressed                                  | 18/2/09 – Prior to first treatment for progressive disease | Alive, Chl/R, day +1129                             |
| CLL13      | 523               | 63  |     | A                                   | NEG    | NEG                | NA     | NA   | Untreated                      | Untreated                                       | 6/1/10 – 4 months post treatment                           | Alive, day +993                                     |
| CLL14      | 579               | 63  |     | A                                   | POS    | NEG                | NA     | M    | Untreated                      | Untreated                                       | 6/1/10 – 4 months post treatment                           | Alive day +2708                                     |

IgVH, Immunoglobulin Variable Region Mutation status:- M indicates mutated; UM, unmutated; NA, not assessed;  
NA, Not available; FC, fludarabine+cyclophosphamide; FCR, fludarabine+cyclophosphamide+rituximab; FCO, fludarabine+cyclophosphamide+ofatumumab; Chl, chlorambucil; Chl/R, chlorambucil+rituximab; Methylpred, methylprednisolone

**Table S1. CLL patient characteristics.**

| AML Patient ID | Age | Gender | Diagnosis and Treatment                                     | Cytogenetics | Transplant History | Samples Analyzed    | GvHD                        | ALC | Clinical Condition at the end of study (12/2012)                            |
|----------------|-----|--------|-------------------------------------------------------------|--------------|--------------------|---------------------|-----------------------------|-----|-----------------------------------------------------------------------------|
| AML1           | 65  | M      | AML, ADE x2                                                 | monosomy 7   | MUD                | 21 months post SCT  | No                          | 1.2 | 23 months post transplant: Death due to Relapse †                           |
| AML2           | 67  | F      | AML, DAx3, CR1                                              | normal       | MUD                | 11 months post SCT  | No                          | 1.3 | 26 months post transplant: In Remission and well                            |
| AML3           | 64  | F      | AML DA x2, MIDAC, CR1                                       | FLT3pos      | 2 Cord Bloods      | 9 months post SCT   | No                          | 1.3 | 26 months post transplant: In Remission and well                            |
| AML4           | 67  | M      | AML MIDAC x3 CR1                                            | normal       | Sibling            | 10 months post SCT  | Skin                        | 2.3 | 10 months post transplant: Relapsed. Patient died 13 months post transplant |
| AML5           | 62  | F      | AML, DAx2, MACE                                             | normal       | MUD                | 21 months post SCT  | No                          | 1.3 | 39 months post transplant: In Remission and well                            |
| AML6           | 65  | M      | AML DA/Myelotarg, DA CR1                                    | normal       | MUD                | 3 months post SCT   | No                          | 1.5 | 3 months post transplant: Death †                                           |
| AML7           | 54  | F      | AML, AML 17 (ADE X2) CR1                                    | monosomy 7   | MUD                | 7 months post SCT   | Gut                         | 0.9 | 25 months post transplant: In Remission and well                            |
| AML8           | 56  | M      | MDS transformed to AML, [DAx2, MACE, MIDAC] [ARA-C], CR2    | normal       | MUD                | 6 months post SCT   | Skin now resolved           | 1   | 25 months post transplant: In Remission and well                            |
| AML9           | 51  | F      | MDS no treatment                                            | trisomy 6    | Sibling            | 113 months post SCT | Eyes, mouth, skin and liver | 2.2 | 131 months post transplant: In Remission and well                           |
| AML10          | 66  | F      | AML, [AML 16] [ FLAG x2] CR2                                | normal       | MUD                | 34 months post SCT  | Skin and gut                | 2.7 | 46 months post transplant: In Remission and well                            |
| AML11          | 67  | F      | AML, [DA x2, MIDAC] [ FLAG/Myelotarg, FLAG] [ FLAG x 2] CR3 | normal       | 2 Cord Bloods      | 9 months post SCT   | Gut                         | 5.4 | 27 months post transplant: In Remission and well                            |
| AML12          | 41  | M      | AML, DA x 2, MIDAC, CR1                                     | normal       | Sibling            | 15 months post SCT  | Skin                        | 1.8 | 31 months post transplant: In Remission and well                            |

MUD, matched unrelated donor; ADE, Ara-C, daunorubicin, etoposide; FLAG, fludarabine, Ara-C, idarubicin; DA, daunorubicin, Ara-c; MIDAC; amsacrine, Ara-C, etoposide, mitozantrone; CR = complete remission. (CR1,2,3 = 1st 2nd or 3rd CR). ALC = absolute lymphocyte count (x10<sup>9</sup>/L)

**Table S2. AML patient characteristics.**
